# Supplementary material
Source: PubMed Central journal article supplement (PMC5711271)
Supplement: AnnalsATS.201611-860OC_spaulding_data_supplement.pdf [file AnnalsATS.201611-860OC_spaulding_data_supplement.pdf]

## **Online Data Supplement**

### **Geographic Distribution of Nontuberculous Mycobacterial Species Identified among Clinical Isolates in the United States, 2009-2013**

Alicen B. Spaulding, PhD, MPH, Yi Ling Lai, MPH, Adrian M. Zelazny, PhD, Kenneth N. Olivier, MD, MPH, Sameer S. Kadri, MD, MS, D. Rebecca Prevots, PhD, MPH, Jennifer Adjemian, PhD

**Supplementary table. List of NTM species identified by category in Premier™ Healthcare Database, 2009-2013.**

| Species category                | Species included in category                                                                                                                                                                                                                                                                                                                                                                                                                                                                                                                                                                                                        |
|---------------------------------|-------------------------------------------------------------------------------------------------------------------------------------------------------------------------------------------------------------------------------------------------------------------------------------------------------------------------------------------------------------------------------------------------------------------------------------------------------------------------------------------------------------------------------------------------------------------------------------------------------------------------------------|
| <i>M. abscessus/M. chelonae</i> | Mycobacterium abscessus<br>Mycobacterium chelonae<br>Mycobacterium chelonae/abscessus complex<br>Mycobacterium chelonae complex<br>Mycobacterium massiliense<br>Mycobacterium immunogenum                                                                                                                                                                                                                                                                                                                                                                                                                                           |
| <i>M. fortuitum</i>             | Mycobacterium fortuitum<br>Mycobacterium fortuitum complex<br>Mycobacterium fortuitum/peregrinum group<br>Mycobacterium mageritense<br>Mycobacterium peregrinum/septicum<br>Mycobacterium porcinum<br>Mycobacterium porcinum complex<br>Mycobacterium senegalense<br>Mycobacterium septicum                                                                                                                                                                                                                                                                                                                                         |
| <i>M. kansasii</i>              | Mycobacterium kansasii                                                                                                                                                                                                                                                                                                                                                                                                                                                                                                                                                                                                              |
| <i>M. avium</i> complex         | Mycobacterium avium<br>Mycobacterium avium complex<br>Mycobacterium avium-intracellulare-scrofulaceum complex (MAIS)<br>Mycobacterium intracellulare                                                                                                                                                                                                                                                                                                                                                                                                                                                                                |
| Other pathogenic NTM species    | Mycobacterium alvei<br>Mycobacterium arupense<br>Mycobacterium asiaticum<br>Mycobacterium aubagnense<br>Mycobacterium celatum<br>Mycobacterium chimaera<br>Mycobacterium europaeum<br>Mycobacterium flavescens<br>Mycobacterium haemophilum<br>Mycobacterium interjectum<br>Mycobacterium kumamotoense<br>Mycobacterium lentiflavum<br>Mycobacterium malmoense<br>Mycobacterium marinum<br>Mycobacterium marinum/ulcerans<br>Mycobacterium nonchromogenicum<br>Mycobacterium paraffinicum<br>Mycobacterium phlei<br>Mycobacterium phocaicum<br>Mycobacterium saskatchewanense<br>Mycobacterium scrofulaceum<br>Mycobacterium simiae |

|                                    |                                                                                                                                                                                                                                                                                        |
|------------------------------------|----------------------------------------------------------------------------------------------------------------------------------------------------------------------------------------------------------------------------------------------------------------------------------------|
|                                    | <p>Mycobacterium simiae complex<br/>Mycobacterium simiae-avium group<br/>Mycobacterium stomatepieae<br/>Mycobacterium szulgai<br/>Mycobacterium terrae<br/>Mycobacterium terrae complex</p>                                                                                            |
| Other rapidly growing mycobacteria | <p>Mycobacterium canariasense<br/>Mycobacterium cosmeticum<br/>Mycobacterium goodii<br/>Mycobacterium Group IV rapid grower<br/>Mycobacterium mucogenicum<br/>Mycobacterium mucogenicum complex<br/>Mycobacterium neoaurum<br/>Mycobacterium smegmatis<br/>Mycobacterium wolinskyi</p> |
